# Supplementary material
Source: publisher figshare collection journal article supplement (https://plos.figshare.com/articles/dataset/_/1072427)
Supplement: Supplementary file 1 [file 1 › Table_S1.pdf]

Table S1: Correlations (Spearman's rho) between the early literacy measures

| Variable                        | WRMT-R Word Identification at (T3) | TOWRE Sight Word Efficiency | TOWRE Phonemic Decoding | TOWRE Word Reading Efficiency | WRMT-R Word identification | QUIL Non-word spelling | WIAT-II Spelling |
|---------------------------------|------------------------------------|-----------------------------|-------------------------|-------------------------------|----------------------------|------------------------|------------------|
| Literacy Composite              | .70                                | .93                         | .90                     | .93                           | .93                        | .79                    | .80              |
| WRMT-R Word Identification (T3) |                                    | .73                         | .62                     | .69                           | .71                        | .48                    | .53              |
| TOWRE Sight Word Efficiency     |                                    |                             | .92                     | .98                           | .94                        | .60                    | .70              |
| TOWRE Phonemic Decoding         |                                    |                             |                         | .97                           | .88                        | .62                    | .65              |
| TOWRE Word Reading Efficiency   |                                    |                             |                         |                               | .94                        | .62                    | .69              |
| WRMT-R Word identification      |                                    |                             |                         |                               |                            | .59                    | .71              |
| QUIL Non-word spelling          |                                    |                             |                         |                               |                            |                        | .50              |

All Correlations are significant at the 0.01 level (2-tailed).

NB: All scores except the Literacy Composite are Standard Scores, All measures were taken at T4 unless stated, Literacy composite = (TOWRE Word Reading Efficiency + WRMT-R Word Identification + QUIL Non-word spelling + WIAT-II Spelling)/4, Spearman's rho was used due to the skewed nature of some of the variables
