# Supplementary material
Source: publisher figshare collection journal article supplement (https://plos.figshare.com/articles/dataset/_/1072427)
Supplement: Supplementary file 1 [file 1 › Table_S2.pdf]

Table S2: Correlations (Spearman's rho) between pre-literacy variables at time 1 through to time 4, external (risk) factors, the T4 Literacy Composite, summed number of risk factors present (yes/no) based on median splits, and risk based on having 3 or more factors.

[illegible]

\*\* Correlation is significant at the 0.01 level (2-tailed), \* Correlation is significant at the 0.05 level (2-tailed), † = Standard Scores,

NB: Spearman's rho was used due to the skewed nature of some of the variables, T4 Literacy Composite = (TOWRE Word Reading Efficiency + WRMT Word Identification + QUIL Non-word spelling + WIAT Spelling)/4
