# Supplementary material
Source: publisher figshare collection journal article supplement (https://plos.figshare.com/articles/dataset/_/1072427)
Supplement: Supplementary file 1 [file 1 › Table_S3.pdf]

Table S3: Rotated (direct oblimin with Kaiser normalization) factor matrix for the Parental PSE Scale (N= 135).

| Response Items                                                                | Rotated Factor Loadings |              |
|-------------------------------------------------------------------------------|-------------------------|--------------|
|                                                                               | 1                       | 2            |
| I know how to get my child to listen.                                         | <b>0.8</b>              | 0.466        |
| I am able to manage my child.                                                 | <b>0.793</b>            | 0.346        |
| I am able to help my child cope when they have a problem.                     | <b>0.657</b>            | 0.519        |
| I know how I can help my child when he/she is sad.                            | <b>0.652</b>            | 0.371        |
| I know what to do when child is worried.                                      | <b>0.621</b>            | 0.472        |
| I know about how my child's language will develop.                            | 0.353                   | <b>0.694</b> |
| I feel confident in developing my child's early language and literacy skills. | 0.511                   | <b>0.685</b> |
| I feel confident to develop good problem solving skills in my child.          | <b>0.65</b>             | <b>0.677</b> |
| I know about how my child will learn at school.                               | 0.322                   | <b>0.671</b> |
| I can help my child learn to read and write.                                  | 0.418                   | <b>0.665</b> |
| I feel ready to help my child with schoolwork when the time comes.            | 0.468                   | <b>0.506</b> |
| Eigenvalues                                                                   | 4.95                    | 1.36         |
| % of variance                                                                 | 45.01                   | 12.35        |
| Cronbach's Alpha (for subscales items only)                                   | 0.82                    | 0.85         |

NB: Factor loadings on items included in the two subscale calculations appear in bold.
